# Supplementary material
Source: HighWire-hosted journal article supplement (https://jnm.snmjournals.org/highwire/filestream/94825/field_highwire_adjunct_files/0/154849_Supplemental_Data.pdf)
Supplement: 154849_Supplemental_Data.pdf [file 154849_Supplemental_Data.pdf]

## **Supplemental Materials and Methods**

### *Flow cytometry*

TF expression on the A2780, HT-29 and BxPC-3 cell surface was verified by flow cytometry. Cells were harvested and washed 2 times with ice-cold FACS buffer (PBS without  $\text{Ca}^{2+}$  and  $\text{Mg}^{2+}$ , 0,1%  $\text{NaN}_3$ , 1% HSA) and centrifuged at 4°C at 300G for 5 minutes and suspended at  $3 \times 10^6$  cells/mL. Cells were incubated with primary TF antibody (MAB23391, R&D Systems) at 10  $\mu\text{g}/\text{mL}$  diluted in FACS buffer for 60 minutes on ice, washed 3 times and incubated with FITC conjugated goat-anti-mouse IgG antibody 1:1000 (#554001, BD Pharmingen) for 30 minutes on ice. The cells were washed and assayed by flow cytometry (FACSCanto II, BD Biosciences) and the data analyzed with FlowJo (Tree Star Inc.).

## Supplemental Figures

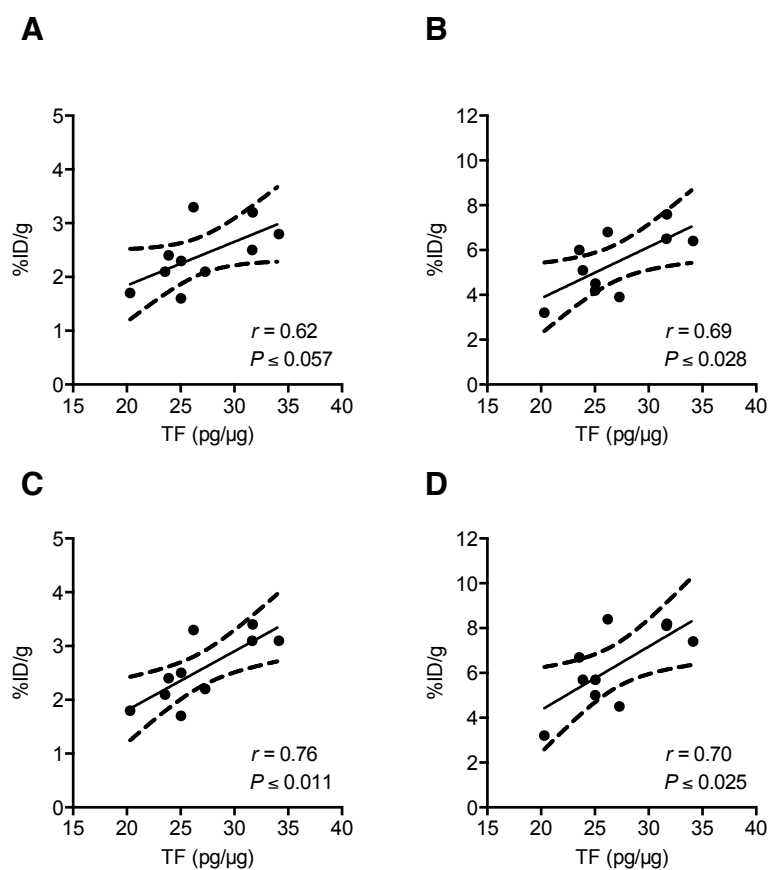

**Supplemental Figure 1:** Correlation between normalized TF protein concentrations measured in tumor homogenates by ELISA and mean (A&C) and max (B&D) uptake of  $^{18}\text{F}$ -FVIIai within the tumors determined by image analysis of the PET images acquired 1 (A&B) and 2 hours (C&D) after injection of  $^{18}\text{F}$ -FVIIai.

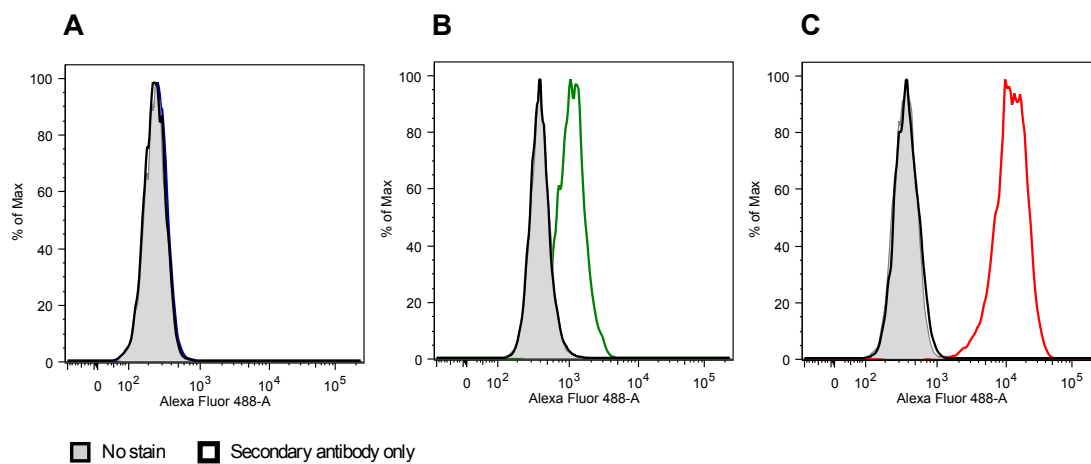

**Supplemental Figure 2:** Cell surface TF expression of A2780 (A), HT-29 (B) and BxPC-3 (C) cells measured by flow cytometry.

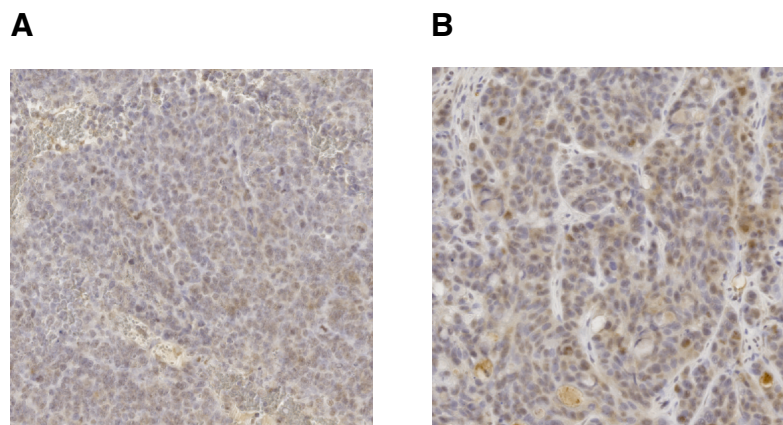

**Supplemental Figure 3:** Immunohistochemical staining for TF in A2780 (A) and HT-29 (B) tumor sections.
